# Supplementary material for: Association of Ambient Fine Particulate Matter Air Pollution With Kidney Transplant Outcomes
Source: PubMed Central journal article supplement (PMC8498852; doi:10.1001/jamanetworkopen.2021.28190), 2021-10-07
Supplement: jamanetwopen-e2128190-s001.pdf [file jamanetwopen-e2128190-s001.pdf]

## Supplemental Online Content

Chang SH, Merzkani M, Murad H, et al. Association of ambient fine particulate matter air pollution with kidney transplant outcomes. *JAMA Netw Open*. 2021;4(10):e2128190.  
doi:10.1001/jamanetworkopen.2021.28190

**eFigure.** Patient Attrition Diagram

**eTable.** Risk of Death-Censored Graft Failure and All-Cause Death and Odds of 1-Year Kidney Rejection by Quartile

This supplemental material has been provided by the authors to give readers additional information about their work.

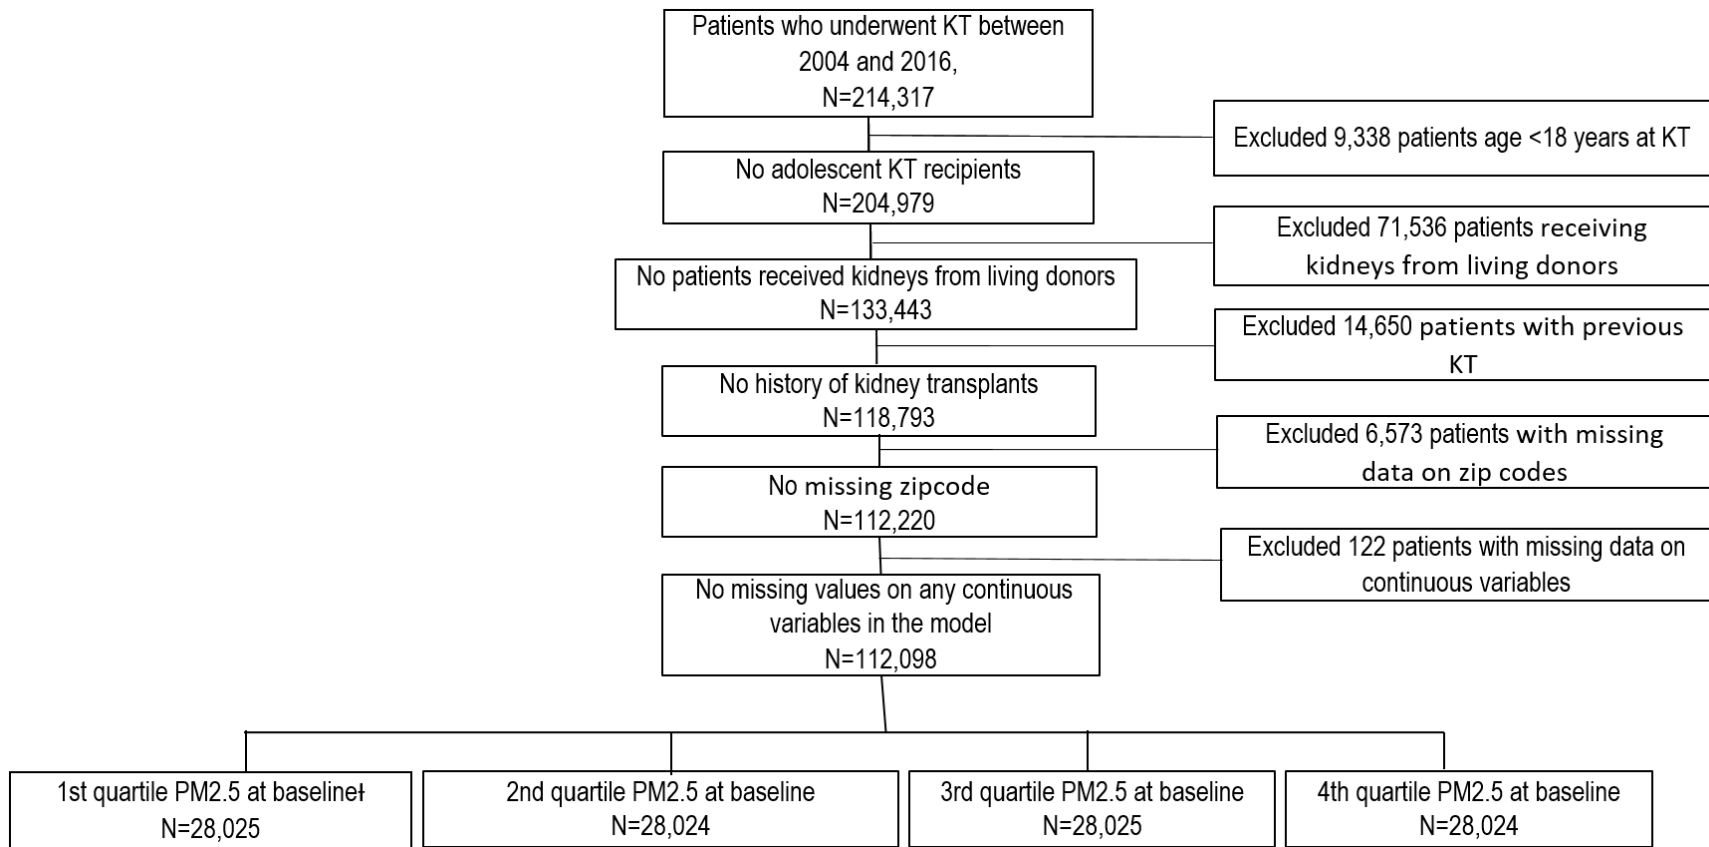

**eFigure. Patient Attrition Diagram**

**eTable.** Risk of Death-Censored Graft Failure and All-Cause Death and Odds of 1-Year Kidney Rejection by Quartile

| Model                                             |              | Quartiles (Ref: Quartile 1) | 1-year kidney rejection, aOR (95% CI) | Graft failure aHR (95% CI)* | All-cause death aHR (95% CI)* |
|---------------------------------------------------|--------------|-----------------------------|---------------------------------------|-----------------------------|-------------------------------|
| Logistic regression adjusting for city clustering |              | Quartile 2                  | 0.99 (0.92, 1.06)                     | -- (--, --)                 | -- (--, --)                   |
|                                                   |              | Quartile 3                  | 1.06 (0.96, 1.16)                     | -- (--, --)                 | -- (--, --)                   |
|                                                   |              | Quartile 4                  | 1.08 (0.96, 1.21)                     | -- (--, --)                 | -- (--, --)                   |
| City-adjusted model                               |              | Quartile 2                  | 0.98 (0.90, 1.07)                     | 1.07 (1.01, 1.13)           | 1.07 (1.02, 1.12)             |
|                                                   |              | Quartile 3                  | 1.06 (0.96, 1.17)                     | 1.13 (1.06, 1.20)           | 1.10 (1.05, 1.16)             |
|                                                   |              | Quartile 4                  | 1.11 (0.99, 1.25)                     | 1.22 (1.14, 1.31)           | 1.18 (1.11, 1.25)             |
| Within city model                                 | Between-city | Quartile 2                  | 1.12 (1.04, 1.19)                     | 1.08 (1.04, 1.13)           | 1.04 (1.00, 1.07)             |
|                                                   |              | Quartile 3                  | 1.07 (0.99, 1.15)                     | 1.13 (1.08, 1.19)           | 1.07 (1.03, 1.11)             |
|                                                   |              | Quartile 4                  | 1.17 (1.09, 1.26)                     | 1.10 (1.05, 1.15)           | 1.07 (1.03, 1.11)             |
|                                                   | Within-city  | Quartile 2                  | 1.05 (0.98, 1.13)                     | 1.00 (0.95, 1.05)           | 0.99 (0.95, 1.03)             |
|                                                   |              | Quartile 3                  | 1.09 (1.01, 1.17)                     | 1.09 (1.03, 1.15)           | 1.05 (1.00, 1.09)             |
|                                                   |              | Quartile 4                  | 1.07 (0.99, 1.17)                     | 1.13 (1.07, 1.19)           | 1.11 (1.06, 1.16)             |

All models adjusted for all recipient characteristics, donor characteristics, transplant factors, contextual factors, and city clustering. Outcomes are reported as adjusted hazard ratios for graft failure and all-cause death and odds ratios for 1-year kidney rejection by baseline PM<sub>2.5</sub> quartile (reference: 1st quartile: PM<sub>2.5</sub>, 1.2-<8.3 µg/m<sup>3</sup>), additionally adjusted for city clustering effect.

\*Robust sandwich variance estimators were used.
